# Supplementary material for: Temperature Effects on Physiochemical Characteristics of Sugar-Based Natural Deep Eutectic Solvents
Source: Hindawi journal article supplement (doi:10.1155/2024/6641317), 2024-03-22
Supplement: f1 [file 6641317.f1.pdf]

**SI Table 1: Density (g/ml) of Sugar-based NADES at Five Different Temperature**

| NADES                 | Density at 22°C |              |                | Density at 27°C |              |                | Density at 40°C |              |                | Density at 60°C |              |                | Density at 80°C |              |                |
|-----------------------|-----------------|--------------|----------------|-----------------|--------------|----------------|-----------------|--------------|----------------|-----------------|--------------|----------------|-----------------|--------------|----------------|
|                       | Density         | Mean Density | Standard Error |
| ChCl:Gl:W<br>(5:2:7)  | 1.2075          | 1.2070       | 0.0003         | 1.2020          | 1.2034       | 0.0009         | 1.1964          | 1.1972       | 0.0007         | 1.1881          | 1.1884       | 0.0001         | 1.1795          | 1.1796       | 0.0001         |
|                       | 1.2072          |              |                | 1.2051          |              |                | 1.1986          |              |                | 1.1884          |              |                | 1.1797          |              |                |
|                       | 1.2064          |              |                | 1.2030          |              |                | 1.1967          |              |                | 1.1886          |              |                | 1.1795          |              |                |
| ChCl:Gl:W<br>(5:2:11) | 1.2044          | 1.2044       | 0.0001         | 1.2008          | 1.2012       | 0.0003         | 1.1942          | 1.1949       | 0.0007         | 1.1866          | 1.1861       | 0.0004         | 1.1774          | 1.1775       | 0.0002         |
|                       | 1.2043          |              |                | 1.2017          |              |                | 1.1962          |              |                | 1.1863          |              |                | 1.1778          |              |                |
|                       | 1.2045          |              |                | 1.2012          |              |                | 1.1942          |              |                | 1.1854          |              |                | 1.1773          |              |                |
| ChCl:Gl:W<br>(5:2:14) | 1.2029          | 1.2025       | 0.0003         | 1.2000          | 1.2000       | 0.0001         | 1.1944          | 1.1939       | 0.0003         | 1.1853          | 1.1851       | 0.0002         | 1.1773          | 1.1776       | 0.0005         |
|                       | 1.2028          |              |                | 1.1998          |              |                | 1.1933          |              |                | 1.1847          |              |                | 1.1786          |              |                |
|                       | 1.2019          |              |                | 1.2003          |              |                | 1.1940          |              |                | 1.1852          |              |                | 1.1769          |              |                |
| ChCl:Fr:W<br>(5:2:7)  | 1.1956          | 1.1952       | 0.0005         | 1.1930          | 1.1929       | 0.0002         | 1.1882          | 1.1876       | 0.0003         | 1.1798          | 1.1801       | 0.0002         | 1.1723          | 1.1725       | 0.0003         |
|                       | 1.1943          |              |                | 1.1925          |              |                | 1.1875          |              |                | 1.1800          |              |                | 1.1722          |              |                |
|                       | 1.1958          |              |                | 1.1933          |              |                | 1.1870          |              |                | 1.1804          |              |                | 1.1730          |              |                |
| ChCl:Fr:W<br>(5:2:11) | 1.1922          | 1.1932       | 0.0006         | 1.1938          | 1.1911       | 0.0014         | 1.1877          | 1.1864       | 0.0007         | 1.1789          | 1.1787       | 0.0001         | 1.1725          | 1.1708       | 0.0009         |
|                       | 1.1942          |              |                | 1.1892          |              |                | 1.1855          |              |                | 1.1786          |              |                | 1.1699          |              |                |
|                       | 1.1931          |              |                | 1.1904          |              |                | 1.1859          |              |                | 1.1787          |              |                | 1.1700          |              |                |
| ChCl:Fr:W<br>(5:2:14) | 1.1904          | 1.1909       | 0.0003         | 1.1893          | 1.1887       | 0.0008         | 1.1832          | 1.1835       | 0.0003         | 1.1760          | 1.1760       | 0.0003         | 1.1687          | 1.1685       | 0.0001         |
|                       | 1.1912          |              |                | 1.1872          |              |                | 1.1833          |              |                | 1.1755          |              |                | 1.1683          |              |                |
|                       | 1.1912          |              |                | 1.1896          |              |                | 1.1840          |              |                | 1.1765          |              |                | 1.1685          |              |                |
| ChCl:Xy:W<br>(5:2:7)  | 1.1906          | 1.1896       | 0.0005         | 1.1877          | 1.1874       | 0.0003         | 1.1819          | 1.1816       | 0.0003         | 1.1739          | 1.1732       | 0.0004         | 1.1660          | 1.1653       | 0.0004         |
|                       | 1.1890          |              |                | 1.1869          |              |                | 1.1819          |              |                | 1.1726          |              |                | 1.1647          |              |                |
|                       | 1.1892          |              |                | 1.1876          |              |                | 1.1809          |              |                | 1.1730          |              |                | 1.1651          |              |                |
| ChCl:Xy:W<br>(5:2:11) | 1.1884          | 1.1885       | 0.0001         | 1.1860          | 1.1857       | 0.0002         | 1.1808          | 1.1800       | 0.0004         | 1.1722          | 1.1714       | 0.0004         | 1.1640          | 1.1636       | 0.0002         |
|                       | 1.1887          |              |                | 1.1853          |              |                | 1.1798          |              |                | 1.1707          |              |                | 1.1637          |              |                |
|                       | 1.1883          |              |                | 1.1858          |              |                | 1.1794          |              |                | 1.1712          |              |                | 1.1632          |              |                |
| ChCl:Xy:W<br>(5:2:14) | 1.1849          | 1.1854       | 0.0003         | 1.1830          | 1.1829       | 0.0002         | 1.1771          | 1.1772       | 0.0002         | 1.1690          | 1.1686       | 0.0005         | 1.1610          | 1.1612       | 0.0003         |
|                       | 1.1858          |              |                | 1.1825          |              |                | 1.1775          |              |                | 1.1676          |              |                | 1.1618          |              |                |
|                       | 1.1856          |              |                | 1.1831          |              |                | 1.1769          |              |                | 1.1693          |              |                | 1.1607          |              |                |
| ChCl:Su:W<br>(5:2:7)  | 1.2668          | 1.2672       | 0.0003         | 1.2653          | 1.2650       | 0.0002         | 1.2588          | 1.2595       | 0.0005         | 1.2521          | 1.2524       | 0.0004         | 1.2431          | 1.2437       | 0.0003         |
|                       | 1.2677          |              |                | 1.2649          |              |                | 1.2605          |              |                | 1.2520          |              |                | 1.2443          |              |                |
|                       | 1.2670          |              |                | 1.2647          |              |                | 1.2593          |              |                | 1.2532          |              |                | 1.2437          |              |                |
| ChCl:Su:W<br>(5:2:11) | 1.2647          | 1.2650       | 0.0002         | 1.2612          | 1.2629       | 0.0009         | 1.2586          | 1.2580       | 0.0003         | 1.2512          | 1.2505       | 0.0004         | 1.2431          | 1.2427       | 0.0002         |
|                       | 1.2649          |              |                | 1.2643          |              |                | 1.2575          |              |                | 1.2504          |              |                | 1.2424          |              |                |
|                       | 1.2654          |              |                | 1.2632          |              |                | 1.2579          |              |                | 1.2499          |              |                | 1.2426          |              |                |
| ChCl:Su:W<br>(5:2:14) | 1.2643          | 1.2624       | 0.0010         | 1.2607          | 1.2606       | 0.0006         | 1.2554          | 1.2558       | 0.0003         | 1.2498          | 1.2482       | 0.0009         | 1.2398          | 1.2400       | 0.0003         |
|                       | 1.2614          |              |                | 1.2615          |              |                | 1.2557          |              |                | 1.2469          |              |                | 1.2396          |              |                |
|                       | 1.2615          |              |                | 1.2595          |              |                | 1.2564          |              |                | 1.2478          |              |                | 1.2406          |              |                |

**SI Table 2: Viscosity (mPa·s) of Sugar-based NADES at Five Different Temperature**

| NADES                  | Viscosity at 22°C |                |                | Viscosity at 27°C |                |                | Viscosity at 40°C |                |                | Viscosity at 60°C |                |                | Viscosity at 80°C |                |                |
|------------------------|-------------------|----------------|----------------|-------------------|----------------|----------------|-------------------|----------------|----------------|-------------------|----------------|----------------|-------------------|----------------|----------------|
|                        | Viscosity         | Mean Viscosity | Standard Error |
| ChCl:Gl:W<br>(5:2:7)   | 570.00            | 569.33         | 0.33           | 442.90            | 443.43         | 0.74           | 185.50            | 184.67         | 0.44           | 78.00             | 78.83          | 0.83           | 34.50             | 34.83          | 0.33           |
|                        | 569.00            |                |                | 442.50            |                |                | 184.50            |                |                | 78.00             |                |                | 34.50             |                |                |
|                        | 569.00            |                |                | 444.90            |                |                | 184.00            |                |                | 80.50             |                |                | 35.50             |                |                |
| ChCl:Gl:W<br>(5:2:11)  | 550.00            | 551.33         | 1.86           | 380.00            | 379.17         | 0.83           | 163.50            | 163.83         | 0.33           | 76.00             | 75.50          | 0.29           | 34.00             | 33.83          | 0.73           |
|                        | 549.00            |                |                | 380.00            |                |                | 163.50            |                |                | 75.50             |                |                | 35.00             |                |                |
|                        | 555.00            |                |                | 377.50            |                |                | 164.50            |                |                | 75.00             |                |                | 32.50             |                |                |
| ChCl:Gl:W<br>(5:2:14)  | 464.00            | 468.33         | 2.19           | 325.27            | 326.01         | 3.55           | 155.50            | 154.17         | 0.73           | 73.00             | 73.50          | 0.29           | 32.00             | 33.17          | 0.60           |
|                        | 471.00            |                |                | 320.27            |                |                | 153.00            |                |                | 74.00             |                |                | 33.50             |                |                |
|                        | 470.00            |                |                | 332.50            |                |                | 154.00            |                |                | 73.50             |                |                | 34.00             |                |                |
| ChCl:Fr:W<br>(5:2:7)   | 385.00            | 386.00         | 0.58           | 184.50            | 185.83         | 0.88           | 130.00            | 129.17         | 0.44           | 55.90             | 55.97          | 0.29           | 32.50             | 32.33          | 0.17           |
|                        | 386.00            |                |                | 185.50            |                |                | 129.00            |                |                | 56.50             |                |                | 32.00             |                |                |
|                        | 387.00            |                |                | 187.50            |                |                | 128.50            |                |                | 55.50             |                |                | 32.50             |                |                |
| ChCl:Fr:W<br>(5:2:11)  | 363.00            | 365.00         | 1.32           | 180.00            | 181.00         | 0.58           | 124.00            | 122.83         | 0.60           | 51.10             | 51.33          | 0.28           | 31.00             | 31.67          | 0.33           |
|                        | 364.50            |                |                | 181.00            |                |                | 122.50            |                |                | 51.90             |                |                | 32.00             |                |                |
|                        | 367.50            |                |                | 182.00            |                |                | 122.00            |                |                | 51.00             |                |                | 32.00             |                |                |
| ChCl:Fr:W<br>(5:2:14)  | 340.00            | 346.50         | 3.91           | 174.00            | 174.50         | 0.29           | 117.50            | 118.50         | 0.58           | 51.50             | 51.00          | 0.29           | 31.00             | 31.17          | 0.17           |
|                        | 353.50            |                |                | 174.50            |                |                | 118.50            |                |                | 50.50             |                |                | 31.50             |                |                |
|                        | 346.00            |                |                | 175.00            |                |                | 119.50            |                |                | 51.00             |                |                | 31.00             |                |                |
| ChCl:Xy:<br>W (5:2:7)  | 520.00            | 521.33         | 0.67           | 415.90            | 417.30         | 2.41           | 171.00            | 172.33         | 0.67           | 67.00             | 65.50          | 0.76           | 37.50             | 37.33          | 0.17           |
|                        | 522.00            |                |                | 414.00            |                |                | 173.00            |                |                | 64.50             |                |                | 37.50             |                |                |
|                        | 522.00            |                |                | 422.00            |                |                | 173.00            |                |                | 65.00             |                |                | 37.00             |                |                |
| ChCl:Xy:<br>W (5:2:11) | 407.00            | 407.33         | 3.18           | 334.00            | 339.67         | 3.18           | 138.50            | 138.83         | 0.17           | 54.50             | 54.67          | 0.44           | 32.00             | 32.00          | 0.29           |
|                        | 402.00            |                |                | 340.00            |                |                | 139.00            |                |                | 54.00             |                |                | 31.50             |                |                |
|                        | 413.00            |                |                | 345.00            |                |                | 139.00            |                |                | 55.50             |                |                | 32.50             |                |                |
| ChCl:Xy:<br>W (5:2:14) | 356.50            | 365.17         | 4.78           | 273.00            | 279.63         | 4.06           | 95.50             | 94.67          | 0.44           | 45.00             | 44.33          | 0.33           | 29.50             | 29.33          | 0.17           |
|                        | 366.00            |                |                | 278.90            |                |                | 94.00             |                |                | 44.00             |                |                | 29.00             |                |                |
|                        | 373.00            |                |                | 287.00            |                |                | 94.50             |                |                | 44.00             |                |                | 29.50             |                |                |
| ChCl:Su:W<br>(5:2:7)   | 2545.00           | 2553.33        | 6.01           | 1840.00           | 1851.33        | 6.36           | 725.00            | 726.00         | 2.08           | 245.00            | 241.00         | 2.02           | 97.50             | 96.33          | 0.60           |
|                        | 2550.00           |                |                | 1852.00           |                |                | 730.00            |                |                | 239.50            |                |                | 96.00             |                |                |
|                        | 2565.00           |                |                | 1862.00           |                |                | 723.00            |                |                | 238.50            |                |                | 95.50             |                |                |
| ChCl:Su:W<br>(5:2:11)  | 2005.00           | 2016.67        | 6.01           | 1382.00           | 1385.33        | 4.37           | 575.00            | 575.67         | 0.33           | 188.00            | 188.00         | 0.00           | 80.00             | 79.83          | 0.17           |
|                        | 2025.00           |                |                | 1380.00           |                |                | 576.00            |                |                | 188.00            |                |                | 79.50             |                |                |
|                        | 2020.00           |                |                | 1394.00           |                |                | 576.00            |                |                | 188.00            |                |                | 80.00             |                |                |
| ChCl:Su:W<br>(5:2:14)  | 1445.00           | 1453.00        | 4.16           | 1105.00           | 1109.00        | 3.06           | 510.00            | 512.33         | 2.33           | 170.00            | 173.00         | 1.53           | 73.50             | 73.00          | 0.29           |
|                        | 1459.00           |                |                | 1115.00           |                |                | 510.00            |                |                | 175.00            |                |                | 72.50             |                |                |
|                        | 1455.00           |                |                | 1107.00           |                |                | 517.00            |                |                | 174.00            |                |                | 73.00             |                |                |

**SI Table 3: Conductivity ( $\mu\text{S}/\text{cm}$ ) of Sugar-based NADES at Different Temperature**

| NADES                 | Conductivity at 22°C |                   |                | Conductivity at 27°C |                   |                | Conductivity at 40°C |                   |                | Conductivity at 60°C |                   |                | Conductivity at 80°C |                   |                |
|-----------------------|----------------------|-------------------|----------------|----------------------|-------------------|----------------|----------------------|-------------------|----------------|----------------------|-------------------|----------------|----------------------|-------------------|----------------|
|                       | Conductivity         | Mean Conductivity | Standard Error |
| ChCl:Gl:W<br>(5:2:7)  | 1301<br>1293<br>1285 | 1293.00           | 4.62           | 1504<br>1508<br>1505 | 1505.67           | 1.20           | 1992<br>2010<br>2020 | 2007.33           | 8.19           | 2780<br>2790<br>2760 | 2776.67           | 8.82           | 3490<br>3550<br>3680 | 3573.33           | 56.08          |
| ChCl:Gl:W<br>(5:2:11) | 1408<br>1401<br>1399 | 1402.67           | 2.73           | 1677<br>1673<br>1664 | 1671.33           | 3.84           | 2110<br>2130<br>2170 | 2136.67           | 17.64          | 2810<br>2920<br>3020 | 2916.67           | 60.64          | 3690<br>3770<br>3860 | 3773.33           | 49.10          |
| ChCl:Gl:W<br>(5:2:14) | 1567<br>1556<br>1560 | 1561.00           | 3.21           | 1788<br>1789<br>1790 | 1789.00           | 0.58           | 2320<br>2330<br>2350 | 2333.33           | 8.82           | 3180<br>3190<br>3190 | 3186.67           | 3.33           | 3910<br>3990<br>4070 | 3990.00           | 46.19          |
| ChCl:Fr:W<br>(5:2:7)  | 2283<br>2280<br>2279 | 2280.67           | 1.20           | 2550<br>2570<br>2580 | 2566.67           | 8.82           | 3330<br>3410<br>3470 | 3403.33           | 40.55          | 4520<br>4630<br>4710 | 4620.00           | 55.08          | 6000<br>5980<br>6050 | 6010.00           | 20.82          |
| ChCl:Fr:W<br>(5:2:11) | 2510<br>2520<br>2493 | 2507.67           | 7.88           | 2820<br>2840<br>2770 | 2810.00           | 20.82          | 3700<br>3760<br>3830 | 3763.33           | 37.56          | 4740<br>4800<br>5130 | 4890.00           | 121.24         | 6200<br>6220<br>6230 | 6216.67           | 8.82           |
| ChCl:Fr:W<br>(5:2:14) | 2810<br>2790<br>2780 | 2793.33           | 8.82           | 3150<br>3130<br>3120 | 3133.33           | 8.82           | 4080<br>4080<br>4100 | 4086.67           | 6.67           | 5203<br>5213<br>5203 | 5206.33           | 3.33           | 6460<br>6470<br>6490 | 6473.33           | 8.82           |
| ChCl:Xy:W<br>(5:2:7)  | 2404<br>2391<br>2382 | 2392.33           | 6.39           | 2790<br>2770<br>2760 | 2773.33           | 8.82           | 3500<br>3590<br>3630 | 3573.33           | 38.44          | 4800<br>4910<br>5130 | 4946.67           | 97.01          | 6160<br>6230<br>6300 | 6230.00           | 40.41          |
| ChCl:Xy:W<br>(5:2:11) | 2768<br>2764<br>2761 | 2764.33           | 2.03           | 3190<br>3200<br>3190 | 3193.33           | 3.33           | 4150<br>4200<br>4210 | 4186.67           | 18.56          | 5750<br>5790<br>5810 | 5783.33           | 17.64          | 7083<br>7123<br>7143 | 7116.33           | 17.64          |
| ChCl:Xy:W<br>(5:2:14) | 3150<br>3160<br>3170 | 3160.00           | 5.77           | 3630<br>3620<br>3610 | 3620.00           | 5.77           | 4820<br>4810<br>4800 | 4810.00           | 5.77           | 6320<br>6400<br>6480 | 6400.00           | 46.19          | 8050<br>8040<br>8090 | 8060.00           | 15.28          |
| ChCl:Su:W<br>(5:2:7)  | 607<br>598<br>596    | 600.33            | 3.38           | 773<br>761<br>762    | 765.33            | 3.84           | 1125<br>1136<br>1153 | 1138.00           | 8.14           | 1578<br>1591<br>1591 | 1586.67           | 4.33           | 2010<br>2020<br>2030 | 2020.00           | 5.77           |
| ChCl:Su:W<br>(5:2:11) | 769<br>758<br>750    | 759.00            | 5.51           | 953<br>957<br>948    | 952.67            | 2.60           | 1358<br>1332<br>1329 | 1339.67           | 9.21           | 1756<br>1773<br>1786 | 1771.67           | 8.69           | 2180<br>2200<br>2222 | 2200.67           | 12.13          |
| ChCl:Su:W<br>(5:2:14) | 960<br>939<br>915    | 938.00            | 13.00          | 1113<br>1091<br>1103 | 1102.33           | 6.36           | 1385<br>1415<br>1423 | 1407.67           | 11.57          | 1812<br>1825<br>1842 | 1826.33           | 8.69           | 2280<br>2290<br>2260 | 2276.67           | 8.82           |

**SI Table 4: pH of Sugar-based NADES at Five Different Temperature**

| NADES              | pH at 22°C |         |                | pH at 27°C |         |                | pH at 40°C |         |                | pH at 60°C |         |                | pH at 80°C |         |                |
|--------------------|------------|---------|----------------|------------|---------|----------------|------------|---------|----------------|------------|---------|----------------|------------|---------|----------------|
|                    | pH         | Mean pH | Standard Error |            | Mean pH | Standard Error | pH         | Mean pH | Standard Error | pH         | Mean pH | Standard Error | pH         | Mean pH | Standard Error |
| ChCl:Gl:W (5:2:7)  | 4.79       |         |                | 4.73       |         |                | 4.63       |         |                | 4.84       |         |                | 4.38       |         |                |
|                    | 4.79       | 4.79    | 0.0033         | 4.72       | 4.72    | 0.0088         | 4.64       | 4.64    | 0.0058         | 4.81       | 4.81    | 0.0145         | 4.37       | 4.39    | 0.0120         |
|                    | 4.80       |         |                | 4.70       |         |                | 4.65       |         |                | 4.79       |         |                | 4.41       |         |                |
| ChCl:Gl:W (5:2:11) | 4.86       |         |                | 4.50       |         |                | 4.65       |         |                | 4.75       |         |                | 4.59       |         |                |
|                    | 4.86       | 4.86    | 0.0033         | 4.49       | 4.49    | 0.0033         | 4.74       | 4.71    | 0.0300         | 4.76       | 4.76    | 0.0033         | 4.57       | 4.58    | 0.0067         |
|                    | 4.87       |         |                | 4.49       |         |                | 4.74       |         |                | 4.76       |         |                | 4.57       |         |                |
| ChCl:Gl:W (5:2:14) | 4.89       |         |                | 4.81       |         |                | 4.90       |         |                | 4.97       |         |                | 4.73       |         |                |
|                    | 4.91       | 4.91    | 0.0088         | 4.80       | 4.80    | 0.0058         | 4.90       | 4.90    | 0.0033         | 4.93       | 4.94    | 0.0153         | 4.71       | 4.71    | 0.0088         |
|                    | 4.92       |         |                | 4.79       |         |                | 4.89       |         |                | 4.92       |         |                | 4.70       |         |                |
| ChCl:Fr:W (5:2:7)  | 3.62       |         |                | 4.26       |         |                | 4.27       |         |                | 3.27       |         |                | 3.42       |         |                |
|                    | 3.60       | 3.60    | 0.0115         | 4.25       | 4.25    | 0.0033         | 4.26       | 4.26    | 0.0033         | 3.29       | 3.28    | 0.0058         | 3.41       | 3.41    | 0.0033         |
|                    | 3.58       |         |                | 4.25       |         |                | 4.26       |         |                | 3.28       |         |                | 3.41       |         |                |
| ChCl:Fr:W (5:2:11) | 3.37       |         |                | 4.15       |         |                | 3.69       |         |                | 3.06       |         |                | 3.25       |         |                |
|                    | 3.35       | 3.35    | 0.0088         | 4.12       | 4.12    | 0.0203         | 3.71       | 3.71    | 0.0145         | 3.05       | 3.05    | 0.0058         | 3.24       | 3.24    | 0.0033         |
|                    | 3.34       |         |                | 4.08       |         |                | 3.74       |         |                | 3.04       |         |                | 3.24       |         |                |
| ChCl:Fr:W (5:2:14) | 3.70       |         |                | 4.26       |         |                | 4.18       |         |                | 3.56       |         |                | 3.59       |         |                |
|                    | 3.69       | 3.69    | 0.0058         | 4.25       | 4.26    | 0.0033         | 4.17       | 4.18    | 0.0033         | 3.56       | 3.56    | 0.0033         | 3.59       | 3.59    | 0.0033         |
|                    | 3.68       |         |                | 4.26       |         |                | 4.18       |         |                | 3.57       |         |                | 3.58       |         |                |
| ChCl:Xy:W (5:2:7)  | 4.62       |         |                | 4.62       |         |                | 4.50       |         |                | 4.52       |         |                | 4.43       |         |                |
|                    | 4.62       | 4.61    | 0.0067         | 4.62       | 4.62    | 0.0000         | 4.49       | 4.49    | 0.0033         | 4.50       | 4.49    | 0.0176         | 4.43       | 4.43    | 0.0000         |
|                    | 4.60       |         |                | 4.62       |         |                | 4.49       |         |                | 4.46       |         |                | 4.43       |         |                |
| ChCl:Xy:W (5:2:11) | 4.75       |         |                | 4.51       |         |                | 4.74       |         |                | 4.51       |         |                | 4.18       |         |                |
|                    | 4.73       | 4.73    | 0.0088         | 4.50       | 4.50    | 0.0033         | 4.73       | 4.73    | 0.0088         | 4.51       | 4.51    | 0.0033         | 4.17       | 4.18    | 0.0033         |
|                    | 4.72       |         |                | 4.50       |         |                | 4.71       |         |                | 4.50       |         |                | 4.18       |         |                |
| ChCl:Xy:W (5:2:14) | 4.78       |         |                | 4.75       |         |                | 4.57       |         |                | 4.65       |         |                | 4.45       |         |                |
|                    | 4.77       | 4.77    | 0.0058         | 4.73       | 4.72    | 0.0176         | 4.57       | 4.57    | 0.0000         | 4.64       | 4.64    | 0.0058         | 4.44       | 4.44    | 0.0033         |
|                    | 4.76       |         |                | 4.69       |         |                | 4.57       |         |                | 4.63       |         |                | 4.44       |         |                |
| ChCl:Su:W (5:2:7)  | 4.59       |         |                | 4.56       |         |                | 4.61       |         |                | 4.32       |         |                | 4.50       |         |                |
|                    | 4.57       | 4.57    | 0.0115         | 4.53       | 4.54    | 0.0100         | 4.57       | 4.58    | 0.0176         | 4.31       | 4.30    | 0.0123         | 4.53       | 4.52    | 0.0100         |
|                    | 4.55       |         |                | 4.53       |         |                | 4.55       |         |                | 4.28       |         |                | 4.53       |         |                |
| ChCl:Su:W (5:2:11) | 4.22       |         |                | 4.34       |         |                | 4.55       |         |                | 4.52       |         |                | 4.16       |         |                |
|                    | 4.21       | 4.21    | 0.0058         | 4.31       | 4.31    | 0.0145         | 4.56       | 4.56    | 0.0058         | 4.50       | 4.49    | 0.0176         | 4.13       | 4.14    | 0.0120         |
|                    | 4.20       |         |                | 4.29       |         |                | 4.57       |         |                | 4.46       |         |                | 4.12       |         |                |
| ChCl:Su:W (5:2:14) | 4.53       |         |                | 4.61       |         |                | 4.45       |         |                | 4.47       |         |                | 4.24       |         |                |
|                    | 4.52       | 4.52    | 0.0058         | 4.60       | 4.60    | 0.0088         | 4.49       | 4.47    | 0.0120         | 4.46       | 4.46    | 0.0033         | 4.22       | 4.23    | 0.0058         |
|                    | 4.51       |         |                | 4.58       |         |                | 4.46       |         |                | 4.46       |         |                | 4.23       |         |                |
